# Supplementary material for: Hypoglycemia unawareness in type 1 diabetes suppresses brain responses to hypoglycemia
Source: JCI journal article supplement (doi:10.1172/jci97696), 2018-01-30
Supplement: sd2 [file 2]

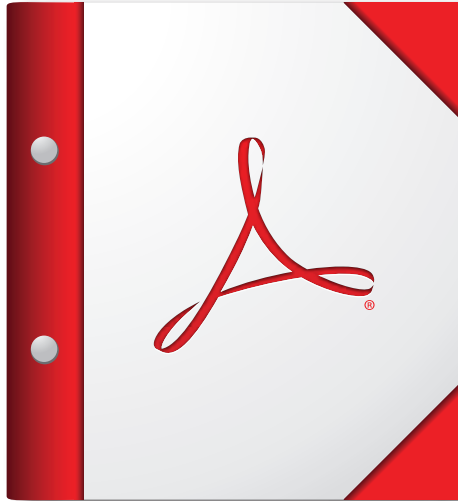

**For the best experience, open this PDF portfolio in  
Acrobat X or Adobe Reader X, or later.**

**Get Adobe Reader Now!**
